# Supplementary material for: Prevalence of malnutrition and associated factors among adult patients on antiretroviral therapy follow-up care in Jimma Medical Center, Southwest Ethiopia
Source: PubMed Central journal article supplement (PMC7067416; doi:10.1371/journal.pone.0229883), 2020-03-12
Supplement: pone.0229883.s002.pdf [file pone.0229883.s002.pdf]

# PLOS ONE

## Prevalence of malnutrition and associated factors among adult patients on Antiretroviral Therapy follow up care in Jimma Medical Center, Southwest Ethiopia. --Manuscript Draft--

|                                                                                                                                                                                                                                                                                                                                                                                     |                                                                                                                                                                                                                                                                                                                                                                                                                                                                                                                                                                                                                                                                                                                                                                                                                                                                                                                                                                                                                                                                                                                                                                                                                                                                                                                                                                                                                                                                                                                                                                                                                                                                                                                                                                                                                                                                                                                                                                                                 |
|-------------------------------------------------------------------------------------------------------------------------------------------------------------------------------------------------------------------------------------------------------------------------------------------------------------------------------------------------------------------------------------|-------------------------------------------------------------------------------------------------------------------------------------------------------------------------------------------------------------------------------------------------------------------------------------------------------------------------------------------------------------------------------------------------------------------------------------------------------------------------------------------------------------------------------------------------------------------------------------------------------------------------------------------------------------------------------------------------------------------------------------------------------------------------------------------------------------------------------------------------------------------------------------------------------------------------------------------------------------------------------------------------------------------------------------------------------------------------------------------------------------------------------------------------------------------------------------------------------------------------------------------------------------------------------------------------------------------------------------------------------------------------------------------------------------------------------------------------------------------------------------------------------------------------------------------------------------------------------------------------------------------------------------------------------------------------------------------------------------------------------------------------------------------------------------------------------------------------------------------------------------------------------------------------------------------------------------------------------------------------------------------------|
| <b>Manuscript Number:</b>                                                                                                                                                                                                                                                                                                                                                           | PONE-D-19-30011                                                                                                                                                                                                                                                                                                                                                                                                                                                                                                                                                                                                                                                                                                                                                                                                                                                                                                                                                                                                                                                                                                                                                                                                                                                                                                                                                                                                                                                                                                                                                                                                                                                                                                                                                                                                                                                                                                                                                                                 |
| <b>Article Type:</b>                                                                                                                                                                                                                                                                                                                                                                | Research Article                                                                                                                                                                                                                                                                                                                                                                                                                                                                                                                                                                                                                                                                                                                                                                                                                                                                                                                                                                                                                                                                                                                                                                                                                                                                                                                                                                                                                                                                                                                                                                                                                                                                                                                                                                                                                                                                                                                                                                                |
| <b>Full Title:</b>                                                                                                                                                                                                                                                                                                                                                                  | Prevalence of malnutrition and associated factors among adult patients on Antiretroviral Therapy follow up care in Jimma Medical Center, Southwest Ethiopia.                                                                                                                                                                                                                                                                                                                                                                                                                                                                                                                                                                                                                                                                                                                                                                                                                                                                                                                                                                                                                                                                                                                                                                                                                                                                                                                                                                                                                                                                                                                                                                                                                                                                                                                                                                                                                                    |
| <b>Short Title:</b>                                                                                                                                                                                                                                                                                                                                                                 | Prevalence of malnutrition and associated factors among adult patients                                                                                                                                                                                                                                                                                                                                                                                                                                                                                                                                                                                                                                                                                                                                                                                                                                                                                                                                                                                                                                                                                                                                                                                                                                                                                                                                                                                                                                                                                                                                                                                                                                                                                                                                                                                                                                                                                                                          |
| <b>Corresponding Author:</b>                                                                                                                                                                                                                                                                                                                                                        | Dawit Wolde Daka, MSc<br>Jimma University<br>Jimma, Oromia ETHIOPIA                                                                                                                                                                                                                                                                                                                                                                                                                                                                                                                                                                                                                                                                                                                                                                                                                                                                                                                                                                                                                                                                                                                                                                                                                                                                                                                                                                                                                                                                                                                                                                                                                                                                                                                                                                                                                                                                                                                             |
| <b>Keywords:</b>                                                                                                                                                                                                                                                                                                                                                                    | Antiretroviral Therapy; Follow-up care; HIV/AIDS; Malnutrition                                                                                                                                                                                                                                                                                                                                                                                                                                                                                                                                                                                                                                                                                                                                                                                                                                                                                                                                                                                                                                                                                                                                                                                                                                                                                                                                                                                                                                                                                                                                                                                                                                                                                                                                                                                                                                                                                                                                  |
| <b>Abstract:</b>                                                                                                                                                                                                                                                                                                                                                                    | <p><b>Abstract</b></p> <p><b>Background:</b> Malnutrition especially under nutrition is the main problem that is seen over people living with HIV/AIDS and can occur at any age. Multiple factors contributed to malnutrition of HIV/AIDS patients and it need immediate identification and prompt action. The objective of this study was to assess the nutritional status of patients and identify factors associated with malnutrition among HIV/AIDS patients on follow-up care in Jimma medical center, Southwest Ethiopia.</p> <p><b>Methods:</b> A cross-sectional study design was conducted from March-April, 2016. Data was collected retrospectively from clinical records of HIV/AIDS patients enrolled for follow up care in ART clinic from June 2010 to January 2016. Binary and multiple variable logistic regression was done to identify independent predictor of malnutrition.</p> <p><b>Results:</b> Data of 971 patients were included in the study. The prevalence of under nutrition (BMI&lt;18.5) was (36.8%) (95% CI: 33.8%-39.8%) and out of which severe malnutrition accounts 9.7%. Overweight and obese was 8.6%. Malnutrition was more likely among widowed patients (AOR=1.7, 95% CI, 1.034-2.798), patients in the WHO clinical AIDS staging of three (AOR=2.3, 95% CI, 1.392-3.693) and four (AOR=3.2, 95% CI, 1.667-5.943), patients with CD4 cell count of &lt;200 cells/mm<sup>3</sup> (AOR=2.0, 95% CI, 1.463-2.837) and patients with a functional status of bedridden (AOR=4.677, 95% CI, 1.761-12.419) and ambulatory (AOR=2.763, 95% CI, 1.833-4.165).</p> <p><b>Conclusion:</b> Both under nutrition and overweight are prevalent among HIV/AIDS patients in Jimma Medical Center, Ethiopia. Malnutrition was significantly associated with clinical outcome of patients. Hence, nutritional assessment, care and support should be strengthened. Critical identification of malnourished patients and prompt interventions should be undertaken.</p> |
| <b>Order of Authors:</b>                                                                                                                                                                                                                                                                                                                                                            | Dawit Wolde Daka, MSc<br>Meskerem Seboka Ergiba                                                                                                                                                                                                                                                                                                                                                                                                                                                                                                                                                                                                                                                                                                                                                                                                                                                                                                                                                                                                                                                                                                                                                                                                                                                                                                                                                                                                                                                                                                                                                                                                                                                                                                                                                                                                                                                                                                                                                 |
| <b>Additional Information:</b>                                                                                                                                                                                                                                                                                                                                                      |                                                                                                                                                                                                                                                                                                                                                                                                                                                                                                                                                                                                                                                                                                                                                                                                                                                                                                                                                                                                                                                                                                                                                                                                                                                                                                                                                                                                                                                                                                                                                                                                                                                                                                                                                                                                                                                                                                                                                                                                 |
| <b>Question</b>                                                                                                                                                                                                                                                                                                                                                                     | <b>Response</b>                                                                                                                                                                                                                                                                                                                                                                                                                                                                                                                                                                                                                                                                                                                                                                                                                                                                                                                                                                                                                                                                                                                                                                                                                                                                                                                                                                                                                                                                                                                                                                                                                                                                                                                                                                                                                                                                                                                                                                                 |
| <p><b>Financial Disclosure</b></p> <p>Enter a financial disclosure statement that describes the sources of funding for the work included in this submission. Review the <a href="#">submission guidelines</a> for detailed requirements. View published research articles from <a href="#">PLOS ONE</a> for specific examples.</p> <p>This statement is required for submission</p> | <p>The research was awarded by Jimma university Mega Research Project and award was received by DW. The funder had no role in study design, data collection and analysis, decision to publish, or preparation of the manuscript.</p>                                                                                                                                                                                                                                                                                                                                                                                                                                                                                                                                                                                                                                                                                                                                                                                                                                                                                                                                                                                                                                                                                                                                                                                                                                                                                                                                                                                                                                                                                                                                                                                                                                                                                                                                                            |

and **will appear in the published article** if the submission is accepted. Please make sure it is accurate.

#### Unfunded studies

Enter: *The author(s) received no specific funding for this work.*

#### Funded studies

Enter a statement with the following details:

- Initials of the authors who received each award
- Grant numbers awarded to each author
- The full name of each funder
- URL of each funder website
- Did the sponsors or funders play any role in the study design, data collection and analysis, decision to publish, or preparation of the manuscript?
- **NO** - Include this sentence at the end of your statement: *The funders had no role in study design, data collection and analysis, decision to publish, or preparation of the manuscript.*
- **YES** - Specify the role(s) played.

\* typeset

#### Competing Interests

Use the instructions below to enter a competing interest statement for this submission. On behalf of all authors, disclose any [competing interests](#) that could be perceived to bias this work—acknowledging all financial support and any other relevant financial or non-financial competing interests.

This statement **will appear in the published article** if the submission is accepted. Please make sure it is accurate. View published research articles from [PLOS ONE](#) for specific examples.

No authors have competing interests. The authors have declared that no competing interests exist.

**NO authors have competing interests**

Enter: *The authors have declared that no competing interests exist.*

**Authors with competing interests**

Enter competing interest details beginning with this statement:

*I have read the journal's policy and the authors of this manuscript have the following competing interests: [insert competing interests here]*

\* typeset

**Ethics Statement**

Enter an ethics statement for this submission. This statement is required if the study involved:

- Human participants
- Human specimens or tissue
- Vertebrate animals or cephalopods
- Vertebrate embryos or tissues
- Field research

Write "N/A" if the submission does not require an ethics statement.

General guidance is provided below. Consult the [submission guidelines](#) for detailed instructions. **Make sure that all information entered here is included in the Methods section of the manuscript.**

The study was approved by Jimma University Institute of Ethics Review Committee. A detailed ethics statement was included under the methods section.

**Format for specific study types**

**Human Subject Research (involving human participants and/or tissue)**

- Give the name of the institutional review board or ethics committee that approved the study
- Include the approval number and/or a statement indicating approval of this research
- Indicate the form of consent obtained (written/oral) or the reason that consent was not obtained (e.g. the data were analyzed anonymously)

**Animal Research (involving vertebrate animals, embryos or tissues)**

- Provide the name of the Institutional Animal Care and Use Committee (IACUC) or other relevant ethics board that reviewed the study protocol, and indicate whether they approved this research or granted a formal waiver of ethical approval
- Include an approval number if one was obtained
- If the study involved *non-human primates*, add *additional details* about animal welfare and steps taken to ameliorate suffering
- If anesthesia, euthanasia, or any kind of animal sacrifice is part of the study, include briefly which substances and/or methods were applied

**Field Research**

Include the following details if this study involves the collection of plant, animal, or other materials from a natural setting:

- Field permit number
- Name of the institution or relevant body that granted permission

**Data Availability**

Authors are required to make all data underlying the findings described fully available, without restriction, and from the time of publication. PLOS allows rare exceptions to address legal and ethical concerns. See the [PLOS Data Policy](#) and [FAQ](#) for detailed information.

Yes - all data are fully available without restriction

A Data Availability Statement describing where the data can be found is required at submission. Your answers to this question constitute the Data Availability Statement and **will be published in the article**, if accepted.

**Important:** Stating 'data available on request from the author' is not sufficient. If your data are only available upon request, select 'No' for the first question and explain your exceptional situation in the text box.

Do the authors confirm that all data underlying the findings described in their manuscript are fully available without restriction?

**Describe where the data may be found in full sentences. If you are copying our sample text, replace any instances of XXX with the appropriate details.**

- If the data are **held or will be held in a public repository**, include URLs, accession numbers or DOIs. If this information will only be available after acceptance, indicate this by ticking the box below. For example: *All XXX files are available from the XXX database (accession number(s) XXX, XXX).*
- If the data are all contained **within the manuscript and/or Supporting Information files**, enter the following: *All relevant data are within the manuscript and its Supporting Information files.*
- If neither of these applies but you are able to provide **details of access elsewhere**, with or without limitations, please do so. For example:

*Data cannot be shared publicly because of [XXX]. Data are available from the XXX Institutional Data Access / Ethics Committee (contact via XXX) for researchers who meet the criteria for access to confidential data.*

*The data underlying the results presented in the study are available from (include the name of the third party*

Data can't be shared publicly because of the issue of ethics in sharing data. Currently data are available from the researcher (contact via: dave86520@gmail.com) for researchers who meet the criteria for access to confidential data. The author would like the journal to help to make data available.

|                                                                                                                                                                                                                                         |                                                                                                                                     |
|-----------------------------------------------------------------------------------------------------------------------------------------------------------------------------------------------------------------------------------------|-------------------------------------------------------------------------------------------------------------------------------------|
| <p><i>and contact information or URL).</i></p> <ul style="list-style-type: none"><li>• This text is appropriate if the data are owned by a third party and authors do not have permission to share the data.</li></ul> <p>* typeset</p> |                                                                                                                                     |
| Additional data availability information:                                                                                                                                                                                               | Tick here if your circumstances are not covered by the questions above and you need the journal's help to make your data available. |

1 **Title:**

2 Prevalence of malnutrition and associated factors among adult patients  
3 on Antiretroviral Therapy follow up care in Jimma Medical Center,  
4 Southwest Ethiopia.

5 **Authors:**

6 Dawit Wolde Daka (MSc)<sup>1\*</sup>, Meskerem Seboka Ergiba (MSc)<sup>2¶</sup>

7

8

9

10 <sup>1</sup>Department of Health Economics, Management and Policy; Jimma University, Jimma, Ethiopia.

11

12 <sup>2</sup>Department of Health Economics, Management and Policy; Jimma University, Jimma, Ethiopia.

13

14

15 \* Corresponding author

16 E-mail: [dave86520@gmail.com](mailto:dave86520@gmail.com) or [dawit818@yahoo.com](mailto:dawit818@yahoo.com)

17

18 ¶ This author equally contributed to this work

19

## 20 Abstract

21 **Background:** Malnutrition especially under nutrition is the main problem that is seen over  
22 people living with HIV/AIDS and can occur at any age. Multiple factors contributed to  
23 malnutrition of HIV/AIDS patients and it need immediate identification and prompt action. The  
24 objective of this study was to assess the nutritional status of patients and identify factors  
25 associated with malnutrition among HIV/AIDS patients on follow-up care in Jimma medical  
26 center, Southwest Ethiopia.

27 **Methods:** A cross-sectional study design was conducted from March-April, 2016. Data was  
28 collected retrospectively from clinical records of HIV/AIDS patients enrolled for follow up care  
29 in ART clinic from June 2010 to January 2016. Binary and multiple variable logistic regression  
30 was done to identify independent predictor of malnutrition.

31 **Results:** Data of 971 patients were included in the study. The prevalence of under nutrition  
32 (BMI<18.5) was (36.8%) (95% CI: 33.8%-39.8%) and out of which severe malnutrition accounts  
33 9.7%. Overweight and obese was 8.6%. Malnutrition was more likely among widowed patients  
34 (AOR=1.7, 95% CI, 1.034-2.798), patients in the WHO clinical AIDS staging of three  
35 (AOR=2.3, 95% CI, 1.392-3.693) and four (AOR=3.2, 95% CI, 1.667-5.943), patients with CD4  
36 cell count of <200 cells/mm<sup>3</sup> (AOR=2.0, 95% CI, 1.463-2.837) and patients with a functional  
37 status of bedridden (AOR=4.677, 95% CI, 1.761-12.419) and ambulatory (AOR=2.763, 95% CI,  
38 1.833-4.165).

39 **Conclusion:** Both under nutrition and overweight are prevalent among HIV/AIDS patients  
40 in Jimma Medical Center, Ethiopia. Malnutrition was significantly associated with clinical



41 outcome of patients. Hence, nutritional assessment, care and support should be strengthened.  
42 Critical identification of malnourished patients and prompt interventions should be undertaken.

## 43 **Introduction**

44 Human immune deficiency virus (HIV) and malnutrition has multifaceted and multidirectional  
45 relationships. Both are related each other in causing progressive damage to the immune system.  
46 HIV compromises nutritional status and poor nutrition further weakness the immune system of  
47 individuals, increasing susceptibility to opportunistic infections. HIV can cause or worsen  
48 malnutrition by causing reduced food uptake, increased energy requirements and poor nutrient  
49 absorptions(1–3).

50 Poor nutritional status is one of the major complications of HIV and a significant factor in a full-  
51 blown AIDS. In many resource limited settings, many people who become infected with HIV  
52 may already be undernourished due to factors such as unemployment and difficulty to procure  
53 food. Food insecurity remains the major challenge in the progresses made to avert morbidity and  
54 mortality attributed to HIV/AIDS. Food insecurity and malnutrition increase high risk sexual  
55 behaviors, inconsistent condom use and multiple partnership. On the other hand, malnutrition  
56 leads to ART non-adherence among HIV/AIDS patients (4,5).

57 In Sub-Saharan Africa region, malnutrition (both under nutrition and overweight) is prevalent  
58 among HIV/AIDS patients enrolled in care (6–8). The prevalence of adult under nutrition is 19%  
59 in Tanzania(6), 10% in Zimbabwe(7) and 19% in Senegal(9). The prevalence of malnutrition is  
60 also high in Ethiopia; 25.2% in Butajira hospital(10) and 12.3% in Dilla university hospital(11).  
61 The main determinants of malnutrition ranges from individual level factors to underlying factors.  
62 Prevalence of malnutrition is determined by wealth index and educational attainment, where

63 malnutrition decreased with increase in wealth index and educational attainment(12). A lower  
64 CD4 cell count, sex, age, advanced HIV diseases, presence of opportunistic infections, adherence  
65 concern, inability to access food and having social support were also significantly associated  
66 with malnutrition (6,7,9,13). Malnutrition is less likely in Females and older ages (35-44 years  
67 and  $\geq 45$  years) compared to 15-24 years. Having social support and informal care giving had  
68 also reduced the odds of under nutrition(13). On the contrary, malnutrition is more likely in those  
69 who had advanced HIV disease(6,7,9).

70 The high prevalence of HIV/AIDS(14) compounded by high rates of malnutrition remains the  
71 main challenge of health systems in SSA region. Currently, beyond under nutrition, overweight  
72 is also the main problem among HIV/AIDS patients. Despite improvement in treatment coverage  
73 over time(14), treatment effectiveness remains low due to factors such as non-adherence, quality  
74 and nutritional status of patients (15,16). The probability of mortality is highest among patients  
75 with poor nutritional status, as malnutrition is the cause for damage in the immune system and  
76 subsequent susceptibility to illnesses(17).

77 With encouraging effort from government and partners, Ethiopia has achieved encouraging  
78 results by reducing HIV/AIDS morbidity and mortality. Between 2000 and 2017, new HIV  
79 infections reduced by 90% and AIDS related mortality among adults reduced by more than 50%.  
80 While, HIV treatment coverage was reached to 71% in 2017(18). Though, the prevalence of  
81 HIV/AIDS remains high (0.9%) (19) and in 2017 there were an estimated 613,000 people living  
82 with HIV/AIDS, out of which 29% lacked access to treatments. Ethiopia remained one among  
83 the 25 countries with the highest number of new HIV infections worldwide. Out of the 25  
84 countries, 17 were located in Africa region(18).

85 HIV infection and poor nutritional status are interlinked and strengthening nutritional  
86 assessment, care and support is essential to improve the effectiveness of HIV treatments. This  
87 requires generating evidences on the prevalence of malnutrition and factors affecting it. Hence,  
88 this study was aimed to estimate the prevalence of malnutrition (under nutrition) among adult  
89 HIV/AIDS patients enrolled in HIV/AIDS care in the period between 2010 and 2016 at Jimma  
90 Medical Center, a tertiary hospital in Ethiopia with an established HIV/AIDS treatment program.

## 91 **Materials and Methods**

### 92 **Study setting**

93 Jimma Medical Center, formerly known as Jimma University Specialized Hospital, was one of  
94 the teaching hospitals in Ethiopia located in Jimma city administration, 355km Southwest  
95 direction of the capital city, Addis Ababa. It is a government hospital which is an affiliate of  
96 Jimma University providing trainings for health science students in a range of disciples. The  
97 hospital also provides a higher level of clinical care for around 15 million catchment population  
98 located in Southwest part of Ethiopia. The hospital has 36 departments, of which ART clinic was  
99 one among them. Since 2005, the hospital has been providing highly active antiretroviral therapy  
100 (HAART) for people living with HIV/AIDS (PLWHA). During the study period (July 2010 to  
101 January 2016), about a total of 5554 patients were on HAART.

### 102 **Study design**

103 A cross-sectional study design was conducted. Data was collected retrospectively from clinical  
104 records of HIV/AIDS patients enrolled for follow up care in ART clinic from July 2010 to  
105 January 2016. Data was retrieved from Pre-ART and ART log books of adults (>15 years). Data  
106 was extracted from March to April 2016.

## 107 **Study participants selection**

108 The study participants were cohort of HIV/AIDS patients on follow-up care who are eligible for  
109 this study. The study participants were selected by using a systematic sampling strategy; where  
110 the clinical records of ART clients from July 2010 to January 2016 was used as a sampling  
111 frame. First, a sequential numbers starting from 1001 was provided to each records. **The first**  
112 **record of patient was selected using lottery method and every K<sup>th</sup>** records was identified for data  
113 abstraction. HIV/AIDS patients who have a follow-up care on the same facility and that have key  
114 baseline information's such as demographic characteristics (age, ethnicity, and marital status)  
115 and clinical information (such as CD4 count, viral load, WHO clinical stage, weight, height, and  
116 hemoglobin level) were eligible for this study.

117 The sample size was computed using OpenEpi Version 3 sample size calculator for proportions  
118 by using assumptions of a 95% CI, the outcome factor in the population of 46.8%(20) and  
119 **confidence limit of 3%**. The calculated sample size yields 1062.

## 120 **Measurement**

121 A data abstraction tool, having the same structure with ART register and patient cards, was used  
122 to collect data. The tool comprised of components such as patient back ground information,  
123 immunologic status, clinical and laboratory examinations (CD4 count, viral load, WHO clinical  
124 stage, weight, height) and antiretroviral regimen and opportunistic infection prophylaxis. Three  
125 clinicians who had also trained on ART service provision were recruited for data collection.  
126 Another clinician also supervised the overall data collection processes.

## 127 **Statistical analysis**

128 Data was cleaned for inconsistency and incompleteness. Then it was entered to epidata version  
129 3.1 and imported to SPSS version 21. Descriptive statistics was conducted and variables were  
130 presented using mean, frequencies and proportion. Body Mass Index (BMI) was calculated as  
131 weight in kilograms divided by the squares of height in meters ( $\text{kg}/\text{m}^2$ ). For the initial analysis,  
132 BMI was stratified into the WHO criteria:  $<18.5$  (under nutrition),  $>18.5$  to  $25$  (normal nutrition)  
133 and  $>25 \text{ kg}/\text{m}^2$  (overweight and obese). In this study under nutrition or BMI ( $<18.5 \text{ kg}/\text{m}^2$ ) was  
134 estimated (3). Independent predictors of **adult malnutrition**, such as socio-demographic and  
135 clinical characteristics, were determined using **binary and multiple** variable logistic regression.  
136 Covariates for the multiple variable analysis were selected using Backward LR method. While,  
137 the model fitness (goodness) was assessed by using Wald test for individual variables and  
138 maximum likelihood ratio test for overall model.

## 139 **Ethical consideration**

140 Research protocol was submitted to Institute of Health of Jimma university and get ethical  
141 approval (Ref no. RPGC/26/2016; March, 2016). Research permission was obtained from Jimma  
142 Medical Center. Confidentiality of patient information was maintained though use of codes,  
143 where name and personal identifiers of patients was not recorded. Paper based data was kept in a  
144 locked cabinet and computer based data was secured with passwords. Except the research team  
145 member, any one couldn't access patient data.

146

147

148

## 149 **Results**

### 150 **Participation**

151 A total of 971 complete ART registrations and client records which incorporated basic  
152 information's were included in the analysis, making a document completion rate of 91%.

### 153 **Socio-demographic characteristics**

154 Table 1 shows the socio-demographic characteristics of patients on HIV/AIDS follow care. Most  
155 of the study participants were Female (60%) and in the age group of <30 years (41%). Nearly  
156 half (48.2%) of them were married and over half were followers of orthodox religion (58%).  
157 While, 89% were unemployed and slightly over 4 in 10 (43.5%) of them had attended primary  
158 education (**Table 1**).

### 159 **Clinical Characteristics**

160 Table 2 shows the clinical characteristics, HIV/AIDS disclosure status, access to spiritual care  
161 giver and HIV support group, counseling and health education on HIV, and adherence concern of  
162 patients on HIV/AIDS follow care. Majority of patients disclosed their status (87%) and slightly  
163 over 3/4<sup>th</sup> of them had attended HIV related health education sessions (76.5%). Nearly a third  
164 (29%) of them were in the WHO clinical stage of II and another 33% were at WHO stage of III  
165 at start of ART. Moreover, slightly over half (55.8%) have CD4 count <200 and over 3/4<sup>th</sup>  
166 (77.6%) of them had a working functional status at start of ART (**Table 2**).

## 167 **Prevalence of Malnutrition**

168 Table 3 shows the prevalence of malnutrition among the socio-demographic and clinical  
169 characteristics of patients. The prevalence of malnutrition (under nutrition) in the study area was  
170 357(36.8%) (95% CI: 33.8%-39.8%). Out of which, severe malnutrition accounts 94(9.7%) and  
171 moderate malnutrition accounts of 263(27.1%). While, the prevalence of overweight and obese  
172 was 8.6%.

173 Under nutrition was more prevalent in female (57.5%), <30 years age group (41.7%), married  
174 (44.2%), orthodox religious follower (54.6%), primary education status (44%) and unemployed  
175 patients (90.4%) (**Table 3**).

## 176 **Socio-demographic and clinical factors associated with malnutrition**

177 Table 4 and 5 shows binary and multiple variable analysis of different independent variables  
178 associated with malnutrition, respectively. In the binary logistic regression, only marital status  
179 was identified as a socio-demographic candidate variable for multiple variable logistic regression  
180 analysis. The remaining variables didn't show any statistically significant association. The  
181 remaining were clinical variables including WHO clinical AIDS staging, CD4 cell count,  
182 functional status, diagnosed for active TB and patient attended HIV related health education  
183 sessions previously. In the multiple variable logistic regression, marital status, WHO clinical  
184 AIDS staging, CD4 cell count and patient functional status were identified as independent  
185 predictors of malnutrition.

186 With regard to marital status, a greater number of malnourished patients were found in the group  
187 of the widowed (45.7%) followed by the single or never married ones (40.2%). Being a widow  
188 was significantly associated with malnutrition (AOR=1.7, 95% CI, 1.034-2.798).

189 HIV/AIDS patients in the WHO clinical AIDS staging three (47.8%) and four (59.8%) were  
190 more malnourished compared to patients in stage one and two. Being in the WHO clinical AIDS  
191 stage of three (AOR=2.3, 95% CI, 1.392-3.693) and four (AOR=3.2, 95% CI, 1.667-5.943) were  
192 significantly associated with malnutrition among adult HIV/AIDS patients in the study area.

193 Likewise, a greater number of malnourished patients had a CD4 cell count of <200cells/ $\mu$ L (45%  
194 versus 26%) and were bedridden (70%) and ambulatory (61%) in their functional status. There is  
195 a statistical significant association between patients CD4 cell count (AOR=2.0, 95% CI, 1.463-  
196 2.837) and their functional status with malnutrition. Being bedridden (AOR=4.677, 95% CI,  
197 1.761-12.419) and ambulatory (AOR=2.763, 95% CI, 1.833-4.165) were significantly associated  
198 with malnutrition among adult HIV/AIDS patients in the study area.

199 In the binary logistic regression analysis, HIV AIDS disclosure status, being diagnosed for active  
200 TB and attended HIV related health education sessions were significantly associated with  
201 malnutrition. However, the association of these variables was not maintained after adjusting for  
202 all independent variables (**Table 4 and 5**).

## 203 **Discussion**

204 This study was intended to estimate the prevalence of malnutrition and its determinants among  
205 adult HIV/AIDS patients who were enrolled on care or who were on ART treatments. The study  
206 had indicated that the overall prevalence of malnutrition (under nutrition) in the study area was  
207 36.8% and out of which, severe malnutrition (<16 kg/m<sup>2</sup>) accounts of 9.7%. We found that,  
208 patient marital status, WHO clinical **AIDS** staging, CD4 cell count and patient functional status  
209 were significantly associated with malnutrition.



210 The prevalence of malnutrition was higher than a study conducted in different parts of Ethiopia;  
211 12.3% in Dilla university hospital (11) , 25.2% in Butajira hospital (10), 18.2% in Arba Minch  
212 area public health facilities (21), 30% in East Hararghe zone hospitals(22) and 27% in Nekemte  
213 referral hospital (23). Likewise, the prevalence is also much higher compared to studies done in  
214 different parts of the world; 19.5% in Tanzania(6), 10% in Zimbabwe(7) and 19.2% in  
215 Senegal(9). The difference in prevalence of malnutrition might be due to difference in socio-  
216 economic and other factors that may predispose the community to problem, such as food habit  
217 and culture. However, the prevalence of severe malnutrition ( $BMI < 16 \text{ kg/m}^2$ ) was comparable to  
218 studies done at Tanzania (9%)(6) and Butajira hospital(9%)(10).

219 In our study under nutrition was more prevalent among female patients than male. This is  
220 comparable with other studies done in different parts of Ethiopia; Southern (11)and Eastern  
221 Ethiopia(22). Yet different from studies done in SSA countries (6,7) and slightly higher among  
222 male patients in study done in Butajira hospital, Southern Ethiopia(10). This implies that under  
223 nutrition is more common among females and this might be related to the socio-economic status  
224 of women, access to information and other predisposing factors that may affect food intake of  
225 women in the community. On the other hand, most women are already undernourished than men  
226 in the general population. In Ethiopia, only 51% of female attended school compared to 65% of  
227 men. Employment status was much higher among men than women. Likewise, most women  
228 were not accessed to mass media and internet compared to men. In Ethiopia, 24% of women  
229 aged 15-49 years were anemic and 22% were thin ( $BMI < 18.5 \text{ kg/m}^2$ ) (19).

230 Our study also indicated that, malnutrition is more prevalent in younger, married, primary  
231 education level and unemployed patients compared to their counter parts. As the age of patient's  
232 increased, the prevalence of malnutrition was decreased in the study area. This is comparable

233 with studies done in different parts of the world (6,7) and Ethiopia(10,22), where under nutrition  
234 is more prevalent among the younger adults and overweight is more prevalent among older  
235 patients. Additionally, studies also supports the higher prevalence of malnutrition among  
236 unemployed patients and patients in the lower educational status(11,24,25). While studies done  
237 in Northern and Southern Ethiopia indicated contradicting finding in which under nutrition was  
238 associated with greater age(11,26). Malnutrition was also much prevalent in patients on WHO  
239 clinical stage three and four, CD4 cell count less than 200 and in patients with a past  
240 opportunistic infections. This indicates interlink between HIV infection and poor nutritional  
241 status. HIV compromises the nutritional status and poor nutrition further weakens the immune  
242 system of individuals, increasing susceptibility to opportunistic infections(2).

243 In the multivariable logistic regression, patient marital status, WHO clinical AIDS staging, CD4  
244 cell count and functional status were statistically associated with under nutrition in the study  
245 area. In the binary logistic regression variables such as diagnosis of active TB, attending HIV  
246 related health education sessions and disclosing HIV status were significantly associated with  
247 malnutrition. Though, these variables didn't show a statistical significant associations while  
248 adjusted for other variables.

249 Our study revealed that, being a widow was significantly associated with malnutrition.  
250 HIV/AIDS patients who were in the WHO clinical stage of three and four were two times and  
251 three times more likely malnourished than those in the WHO clinical stage of one, respectively.  
252 In addition, malnutrition was also more likely among patients with CD4 cell count of <200 and  
253 patients with functional status of bedridden and ambulatory. Malnutrition was nearly five times  
254 and three times more likely among bedridden and ambulatory patients compared to patients who

255 have a working functional status, respectively. Our finding was supported by other studies done  
256 in other areas else(6,7,10,11,13,21,22,24–26).

257 Malnutrition is the major factor in ensuring treatment effectiveness and thus, nutritional  
258 assessments, care and support for HIV/AIDS patients should be strengthened. Poor adherence is  
259 caused by lack of access to food or food insecurity. On the other hand, poor treatment adherence  
260 leads to infections and suppressed immunity of patients(9). Mortality is more likely among  
261 immune compromised HIV/AIDS patients and supplementation of therapeutic food can improve  
262 the nutritional status of patients(17).

263 Our study had assessed the prevalence of malnutrition on patients enrolled in care in the five  
264 successive periods (2010 and 2016). Moreover, adequate sample size was used to estimate  
265 malnutrition prevalence. Yet, our study has the following limitations. The study was based on  
266 secondary data (chart review) and thus may not address all of the variables that may affect  
267 malnutrition and may be subject to incomplete data bias.

## 268 **Conclusions**

269 This finding indicated that the prevalence of malnutrition (both under nutrition and overweight)  
270 was high compared to other settings in Ethiopia. It was also indicated that WHO clinical AIDS  
271 staging three and four, CD4 cell count <200, functional status and marital status were  
272 significantly associated with malnutrition among adult HIV/AIDS patients. Though not  
273 statistically significant when adjusted to other variables, HIV disclosure status and access to HIV  
274 related health education were also associated with malnutrition. Hence, HIV treatment services  
275 should be supported with nutritional assessment, supplementation, counseling, care and support  
276 to patients. A comprehensive nutritional assessment and support should be provided for all

277 patients on follow-up care. Moreover, community support to patients should be strengthened, as  
278 social determinants of health may also interact with effectiveness of treatments.

## 279 **Acknowledgments**

280 The authors would like to thank Jimma Medical Center and Workers at Antiretroviral Therapy  
281 (ART) unit for cooperating with and supporting the research work.

## 282 **Authors Contributions**

283 Conceived and designed the study: WD SM. Conducted the study: WD SM. Analyzed the data:  
284 WD. Wrote the paper: WD SM. Edited the manuscript: WD SM.

## 285 **Conflict of interest**

286 No author declared conflict of interest

## 287 **Table Title**

288 **Table 1. This is Table 1 Title.** Socio-demographic characteristics of patients on HIV/AIDS  
289 follow up care at Jimma Medical Center, Southwest Ethiopia, 2016.

290 **Table 2. This is Table 2 Title.** Clinical and service related characteristics of patients on ART  
291 follow up care in Jimma Medical Center, 2016.

292 **Table 2. This is Table 3 Title.** Socio-demographic and clinical characteristics of study  
293 participants grouped by nutritional status (BMI<sup>a</sup>) in Jimma Medical Center, Southwest Ethiopia,  
294 2016

295 **Table 2. This is Table 4 Title.** Bivariate association of different variables with malnutrition in  
296 PLWHA<sup>b</sup> in Jimma Medical Center, Southwest Ethiopia, 2016

297 **Table 2. This is Table 5 Title.** Adjusted association of different variables with malnutrition in  
298 PLWHA<sup>b</sup> in Jimma Medical Center, Southwest Ethiopia, 2016

## 299 **Table Legend**

300 **This is Table 3 Legend.** BMI<sup>a</sup> = Body Mass Index

301 **This is Table 4 Legend.** PLWHA<sup>b</sup>= People Living with HIV/AIDS, \* P-value<0.05,

302 COR<sup>c</sup>=Crude Odds Ratio, CI<sup>d</sup>= Confidence Interval

303 **This is Table 5 Legend.** <sup>b</sup> PLWHA=People Living with HIV/AIDS, AOR<sup>e</sup>=Adjusted Odds

304 Ratio, CI<sup>d</sup>= Confidence Interval, \* P-value<0.05

305

306

307

308

## 309 **References**

- 310 1. WHO. Technical Consultation on Nutrient Requirements for People Living with  
311 HIV/AIDS (Geneva, Switzerland). 2003.
- 312 2. Food and Nutrition Technical Assistance (FANTA). Guide to Screening for Food and  
313 Nutrition Services among Adolescents and Adults Living with HIV. 2010.
- 314 3. Food and Nutrition Technical Assistance (FANTA). Nutrition Assessment, Counseling,  
315 and Support (NACS). Nutrition Assessment and Classification. A User's Guide. 2016.

- 316 4. Gillespie S KS. HIV/AIDS and Food and Nutrition Security: From Evidence to Action.  
317 Washington: International Food Policy Research Institute. 2005.
- 318 5. Marston B DK. Multivitamins, nutrition, and antiretroviral therapy for HIV disease in  
319 Africa. *N Engl J Med.* 2004;351:78–80.
- 320 6. Kabalimu TK, Sungwa E, Lwabukuna WC. Malnutrition and associated factors among  
321 adults starting on antiretroviral therapy at PASADA Hospital in Temeke District ,  
322 Tanzania. *J Heal Res.* 2018;20(2).
- 323 7. Takarinda KC, Mutasa-apollo T, Madzima B, Nkomo B, Chigumira A, Banda M, et al.  
324 Malnutrition status and associated factors among HIV-positive patients enrolled in ART  
325 clinics in Zimbabwe. *BMC Nutr.* 2017;3:15.
- 326 8. Anabwani G, Ch B, Navario P. Nutrition and HIV / AIDS in sub-Saharan Africa : an  
327 overview. *Rev Artic.* 2005;21:96–9.
- 328 9. Benzekri NA, Sambou J, Diaw B, Hadji E, Sall I. High Prevalence of Severe Food  
329 Insecurity and Malnutrition among HIV-Infected Adults in Senegal , West Africa. *PLoS*  
330 *One.* 2015;1–17.
- 331 10. Gedle D, Gelaw B, Muluye D, Mesele M. Prevalence of malnutrition and its associated  
332 factors among adult people living with HIV / AIDS receiving anti-retroviral therapy at  
333 Butajira Hospital , southern Ethiopia. *BMC Nutr.* 2015;1:5.
- 334 11. Hailemariam S, Bune GT, Ayele HT. Malnutrition: Prevalence and its associated factors  
335 in People living with HIV/AIDS, in Dilla University Referral Hospital. *Arch public Heal*  
336 [Internet]. 2013;71:13. Available from:  
337 <http://www.pubmedcentral.nih.gov/articlerender.fcgi?artid=3683321&tool=pmcentrez&re>

338 ndertype=abstract

- 339 12. Uthman OA. Prevalence and pattern of HIV-related malnutrition among women in sub-  
340 Saharan Africa : a meta-analysis of demographic health surveys. BMC Public Health.  
341 2008;8:226.
- 342 13. Negessie A, Jara D, Taddele M, Burrowes S. Determinants of undernutrition among adult  
343 patients receiving antiretroviral therapy at Debre Markos referral hospital , Northwest  
344 Ethiopia : a case-control study design. BMC Nutr. 2019;5:20.
- 345 14. UNAIDS. GLOBAL HIV STATISTICS. Global AIDS Update 2019. 2019.
- 346 15. UNAIDS. Fact Sheet on HIV/AIDS. 2016.
- 347 16. UNAIDS. HIV/AIDS Prevention Gap Report. 2016.
- 348 17. Mallewa J, Szubert AJ, Mugenyi P, Chidziva E, Thomason MJ, Chepkorir P, et al. Effect  
349 of ready-to-use supplementary food on mortality in severely immunocompromised HIV-  
350 infected individuals in Africa initiating antiretroviral therapy ( REALITY ): an open-label  
351 , parallel-group , randomised controlled trial. Lancet HIV. 2018;5(May):231–40.
- 352 18. Federal HIV/AIDS Prevention and Control Office. HIV Prevention in Ethiopia. National  
353 Road Map (2018 -2020). 2018.
- 354 19. Central Statistical Agency (CSA) and ICF. Ethiopia Demographic and Health Survey.  
355 2016. Available from: <https://dhsprogram.com/pubs/pdf/FR328/FR328.pdf>
- 356 20. Habtamu M, Mulu H, Hamza L, Alemseged F. Prevalence of Malnutrition and Associated  
357 Factors among Hospitalized Patients with Acquired Immunodeficiency Syndrome in  
358 Jimma University Specialized Hospital , Ethiopia. Ethiop J Heal Sci. 2016;26(3).

- 359 21. Care P, Zemedede Z, Estifanos W. Undernutrition and associated factors among HIV-  
360 positive adult patients enrolled in antiretroviral therapy ( ART ) clinics in the Arba Minch  
361 area , southern Ethiopia. HIV/AIDS - Res Palliat Care. 2019;11:147–54.
- 362 22. Dedha M, Damena, Melake, Gudina Egata LN. Undernutrition and associated factors  
363 among adults human immunodeficiency virus positive on antiretroviral therapy in  
364 hospitals , East Hararge Zone , Oromia , Ethiopia : A cross-sectional study. Int J Health  
365 Sci (Qassim). 2017;11(5):35–42.
- 366 23. Meskerem Alemayehu kenea, Sileshi Garoma Habtamu FG. Assessment of Adult  
367 Nutritional Status and Associated Factors among ART Users in Nekemte Referral  
368 Hospital and Health Center, East Wollega Zone, Ethiopia. Adv Life Sci Technol.  
369 2015;29:91–100.
- 370 24. Ab G, Ae G, Db K, Gizaw AB, Eshetu A, Birhanu D. Malnutrition and Associated Factors  
371 among Adult People Living with HIV / AIDS Receiving Antiretroviral Therapy at  
372 Organization for Social Service Health Development in Jimma Town Oromia Region  
373 South West. Gen Med (Los Angeles), an open access. 2018;6(2):4–11.
- 374 25. Gebremichael DY, Hadush KT, Kebede EM, Zegeye RT. Food Insecurity , Nutritional  
375 Status , and Factors Associated with Malnutrition among People Living with HIV / AIDS  
376 Attending Antiretroviral Therapy at Public Health Facilities in West Shewa Zone , Central  
377 Ethiopia. Biomed Res Int. 2018;9.
- 378 26. Sewale Y, Hailu G, Sintayehu M, Moges NA, Alebel A. Magnitude of malnutrition and  
379 associated factors among HIV infected children attending HIV - care in three public  
380 hospitals in East and West Gojjam Zones , Amhara , Northwest , Ethiopia , 2017 : a cross



381 - sectional study. BMC Res Notes [Internet]. 2018;11:788. Available from:  
382 <https://doi.org/10.1186/s13104-018-3882-8>

383

**Table 1.**

| <b>Variables</b>      | <b>Frequency</b> | <b>%</b> |
|-----------------------|------------------|----------|
| <b>Gender</b>         |                  |          |
| <b>Male</b>           | 372              | 40       |
| <b>Female</b>         | 558              | 60       |
| <b>Total</b>          | 930              | 100      |
| <b>Age (in years)</b> |                  |          |
| <b>&lt;30</b>         | 402              | 41.4     |
| <b>30-39</b>          | 368              | 37.9     |
| <b>40-49</b>          | 151              | 15.6     |
| <b>&gt;=50</b>        | 50               | 5.1      |
| <b>Total</b>          | 971              | 100      |
| <b>Marital status</b> |                  |          |
| <b>Married</b>        | 464              | 48.2     |
| <b>Never married</b>  | 164              | 17.0     |
| <b>Separated</b>      | 136              | 14.1     |
| <b>Divorced</b>       | 82               | 8.5      |
| <b>Widowed</b>        | 116              | 12.1     |
| <b>Total</b>          | 962              | 100      |
| <b>Religion</b>       |                  |          |
| <b>Muslim</b>         | 302              | 31.9     |
| <b>Orthodox</b>       | 549              | 58.0     |
| <b>Protestant</b>     | 90               | 9.5      |
| <b>Catholic</b>       | 6                | 0.6      |

|                            |     |      |
|----------------------------|-----|------|
| <b>Total</b>               | 947 | 100  |
| Educational status         |     |      |
| <b>No education</b>        | 188 | 19.5 |
| <b>Primary education</b>   | 418 | 43.5 |
| <b>Secondary education</b> | 266 | 27.7 |
| <b>Tertiary education</b>  | 90  | 9.4  |
| <b>Total</b>               | 962 | 100  |
| Employment status          |     |      |
| <b>Employed</b>            | 95  | 10.5 |
| <b>Unemployed</b>          | 814 | 89.5 |
| <b>Total</b>               | 909 | 100  |
| Running water              |     |      |
| <b>Available</b>           | 771 | 83.4 |
| <b>Not available</b>       | 154 | 16.6 |
| <b>Total</b>               | 925 | 100  |
| Electricity                |     |      |
| <b>Available</b>           | 901 | 97.2 |
| <b>Not available</b>       | 26  | 2.8  |
| <b>Total</b>               | 927 | 100  |

**Table 2.**

| <b>Variables</b>                              | <b>Frequency</b> | <b>Percent</b> |
|-----------------------------------------------|------------------|----------------|
| Disclosure status                             |                  |                |
| <b>Yes</b>                                    | 796              | 87.0           |
| <b>No</b>                                     | 119              | 13.0           |
| <b>Total</b>                                  | 915              | 100            |
| Access to spiritual caregiver                 |                  |                |
| <b>Yes</b>                                    | 490              | 53.1           |
| <b>No</b>                                     | 432              | 46.9           |
| <b>Total</b>                                  | 922              | 100            |
| Access to community support/HIV support group |                  |                |
| <b>Yes</b>                                    | 275              | 29.9           |
| <b>No</b>                                     | 646              | 70.1           |
| <b>Total</b>                                  | 921              | 100            |
| Attended HIV related counseling session       |                  |                |
| <b>Yes</b>                                    | 389              | 42.3           |
| <b>No</b>                                     | 531              | 57.7           |
| <b>Total</b>                                  | 920              | 100            |
| Attended HIV related HE session               |                  |                |
| <b>Yes</b>                                    | 705              | 76.5           |
| <b>No</b>                                     | 217              | 23.5           |
| <b>Total</b>                                  | 922              | 100            |
| Adherence concern                             |                  |                |

|                                                    |     |      |
|----------------------------------------------------|-----|------|
| <b>Stigma</b>                                      | 584 | 70.9 |
| <b>Afraid of medications(side effects)</b>         | 94  | 11.4 |
| <b>Doubt that medications couldn't work</b>        | 51  | 6.2  |
| <b>Depression or anxious</b>                       | 68  | 8.3  |
| <b>Forget to take medication and other reasons</b> | 27  | 3.2  |
| <b>Total</b>                                       | 824 | 100  |

WHO Clinical AIDS staging

|                    |     |      |
|--------------------|-----|------|
| <b>Stage one</b>   | 232 | 24.4 |
| <b>Stage two</b>   | 283 | 29.7 |
| <b>Stage three</b> | 320 | 33.6 |
| <b>Stage four</b>  | 117 | 12.3 |
| <b>Total</b>       | 952 | 100  |

CD4 cell count

|                 |     |      |
|-----------------|-----|------|
| <b>&lt;200</b>  | 506 | 55.8 |
| <b>&gt;=200</b> | 400 | 44.2 |
| <b>Total</b>    | 906 | 100  |

Diagnosed for active TB

|              |     |      |
|--------------|-----|------|
| <b>Yes</b>   | 124 | 13.2 |
| <b>No</b>    | 817 | 86.8 |
| <b>Total</b> | 941 | 100  |

Functional status at start of ART

|                   |     |      |
|-------------------|-----|------|
| <b>Ambulatory</b> | 175 | 19.1 |
| <b>Bedridden</b>  | 30  | 3.3  |

|                                      |     |      |
|--------------------------------------|-----|------|
| <b>Working</b>                       | 711 | 77.6 |
| <b>Total</b>                         | 916 | 100  |
| Patient past opportunistic infection |     |      |
| <b>Yes</b>                           | 805 | 82.9 |
| <b>No</b>                            | 166 | 17.1 |
| <b>Total</b>                         | 971 | 100  |

**Table 3:**

| Variable                     | Normal nutritional status | Under nutrition |
|------------------------------|---------------------------|-----------------|
|                              | No (%)                    | No (%)          |
| Gender                       |                           |                 |
| <b>Male</b>                  | 225(38.5)                 | 147(42.5)       |
| <b>Female</b>                | 359(61.5)                 | 199(57.5)       |
| <b>Total</b>                 | 584(100)                  | 346(100)        |
| Age group (years)            |                           |                 |
| <b>&lt;30</b>                | 253(41.2)                 | 149(41.7)       |
| <b>30-39</b>                 | 227(37)                   | 141(39.5)       |
| <b>40-49</b>                 | 100(16.3)                 | 51(14.3)        |
| <b>&gt;=50</b>               | 34(5.5)                   | 16(4.5)         |
| <b>Total</b>                 | 614(100)                  | 357(100)        |
| Marital status               |                           |                 |
| <b>Married</b>               | 308(50.6)                 | 156(44.2)       |
| <b>Never married/ single</b> | 98(16.1)                  | 66(18.7)        |
| <b>Separated</b>             | 88(14.4)                  | 48(13.6)        |
| <b>Divorced</b>              | 52(8.5)                   | 30(8.5)         |
| <b>Widowed</b>               | 63(10.4)                  | 53(15)          |
| <b>Total</b>                 | 609(100)                  | 353(100)        |
| Religious status             |                           |                 |

|                            |           |           |
|----------------------------|-----------|-----------|
| <b>Muslim</b>              | 185(30.9) | 117(33.6) |
| <b>Orthodox</b>            | 359(59.9) | 190(54.6) |
| <b>Protestant</b>          | 51(8.5)   | 39(11.2)  |
| <b>Catholic</b>            | 4(0.7)    | 2(0.6)    |
| <b>Total</b>               | 599(100)  | 348(100)  |
| Educational status         |           |           |
| <b>No education</b>        | 126(20.7) | 62(17.6)  |
| <b>Primary education</b>   | 263(43.1) | 155(44.0) |
| <b>Secondary education</b> | 164(26.9) | 102(29.0) |
| <b>Tertiary education</b>  | 57(9.3)   | 33(9.0)   |
| <b>Total</b>               | 610(100)  | 352(100)  |
| Employment status          |           |           |
| <b>Employed</b>            | 64(11.1)  | 31(9.3)   |
| <b>Unemployed</b>          | 510(88.9) | 304(90.7) |
| <b>Total</b>               | 574(100)  | 335(100)  |
| WHO Clinical AIDS staging  |           |           |
| <b>Stage one</b>           | 174(29)   | 58(16.5)  |
| <b>Stage two</b>           | 212(35.3) | 71(20.2)  |
| <b>Stage three</b>         | 167(27.8) | 153(43.5) |
| <b>Stage four</b>          | 47(7.8)   | 70(19.9)  |



|                                      |           |           |
|--------------------------------------|-----------|-----------|
| <b>Total</b>                         | 600(100)  | 352(100)  |
| CD4 cell count                       |           |           |
| <b>&lt;200</b>                       | 277(48.4) | 229(68.6) |
| <b>≥200</b>                          | 295(51.6) | 105(31.4) |
| <b>Total</b>                         | 572(100)  | 334(100)  |
| Functional status                    |           |           |
| <b>Ambulatory</b>                    | 68(11.7)  | 107(31.8) |
| <b>Bed ridden</b>                    | 9(1.6)    | 21(6.3)   |
| <b>Working</b>                       | 503(86.7) | 208(61.9) |
| <b>Total</b>                         | 580(100)  | 336(100)  |
| Patient past opportunistic infection |           |           |
| <b>Yes</b>                           | 508(82.7) | 297(83.2) |
| <b>No</b>                            | 106(17.3) | 60(16.8)  |
| <b>Total</b>                         | 614(100)  | 357(100)  |
| HIV/AIDS Disclosure status           |           |           |
| <b>Yes</b>                           | 513(89.4) | 283(83)   |
| <b>No</b>                            | 61(10.6)  | 58(17)    |
| <b>Total</b>                         | 574(100)  | 341(100)  |
| Access to spiritual care giver       |           |           |
| <b>Yes</b>                           | 313(53.1) | 177(53.2) |

|                                         |           |           |
|-----------------------------------------|-----------|-----------|
| <b>No</b>                               | 276(46.9) | 156(46.8) |
| <b>Total</b>                            | 589(100)  | 333(100)  |
| Access to community support group       |           |           |
| <b>Yes</b>                              | 174(29.9) | 101(29.8) |
| <b>No</b>                               | 408(70.1) | 238(70.2) |
| <b>Total</b>                            | 582(100)  | 339(100)  |
| Attended HIV related counseling session |           |           |
| <b>Yes</b>                              | 244(42)   | 145(42.8) |
| <b>No</b>                               | 337(58)   | 194(57.2) |
| <b>Total</b>                            | 581(100)  | 339(100)  |
| Attended HIV related HE session         |           |           |
| <b>Yes</b>                              | 459(78.9) | 246(72.4) |
| <b>No</b>                               | 123(21.1) | 94(27.6)  |
| <b>Total</b>                            | 582(100)  | 340(100)  |
| Diagnosed for active TB                 |           |           |
| <b>Yes</b>                              | 63(10.6)  | 61(17.6)  |
| <b>No</b>                               | 531(89.4) | 286(82.4) |
| <b>Total</b>                            | 594(100)  | 347(100)  |



**Table 4:**

| Variables                    | Normal nutritional status<br>No (%) | Under nutrition<br>No (%) | COR <sup>c</sup> (95% CI <sup>d</sup> ) |
|------------------------------|-------------------------------------|---------------------------|-----------------------------------------|
| Gender                       |                                     |                           |                                         |
| <b>Male</b>                  | 225(60.5)                           | 147(39.5)                 | 1                                       |
| <b>Female</b>                | 359(64.3)                           | 199(35.7)                 | 0.848(0.647-1.112)                      |
| <b>Total</b>                 | 608(65.4)                           | 398(34.6)                 |                                         |
| Age group (years)            |                                     |                           |                                         |
| <b>&lt;30</b>                | 253(62.9)                           | 149(37.1)                 | 1                                       |
| <b>30-39</b>                 | 227(61.7)                           | 141(38.3)                 | 1.055(0.788-1.412)                      |
| <b>40-49</b>                 | 100(66.2)                           | 51(33.8)                  | 0.866(0.584-1.283)                      |
| <b>&gt;=50</b>               | 34(68)                              | 16(32)                    | 0.799(0.427-1.497)                      |
| <b>Total</b>                 | 614(63.2)                           | 357(36.8)                 |                                         |
| Marital status               |                                     |                           |                                         |
| <b>Married</b>               | 308(66.4)                           | 156(33.6)                 | 1                                       |
| <b>Never married/ single</b> | 98(59.8)                            | 66(40.2)                  | 1.330(0.921-1.919)                      |
| <b>Separated</b>             | 88(64.7)                            | 48(35.3)                  | 1.077(0.721-1.608)                      |
| <b>Divorced</b>              | 52(63.4)                            | 30(36.6)                  | 1.139(0.699-1.857)                      |
| <b>Widowed</b>               | 63(54.3)                            | 53(45.7)                  | 1.661(1.099-2.510)*                     |
| <b>Total</b>                 | 609(63.3)                           | 353(36.7)                 |                                         |
| Educational status           |                                     |                           |                                         |

|                            |           |           |                     |
|----------------------------|-----------|-----------|---------------------|
| <b>No education</b>        | 126(67)   | 62(33)    | 1                   |
| <b>Primary education</b>   | 263(62.9) | 155(37.1) | 1.198(0.833-1.722)  |
| <b>Secondary education</b> | 164(61.7) | 102(38.3) | 1.264(0.854-1.870)  |
| <b>Tertiary education</b>  | 57(63.3)  | 33(36.7)  | 1.177(0.696-1.990)  |
| <b>Total</b>               | 610(63.4) | 352(36.6) |                     |
| Employment status          |           |           |                     |
| <b>Employed</b>            | 64(67.4)  | 31(32.6)  | 1                   |
| <b>Unemployed</b>          | 510(62.7) | 304(37.3) | 1.231(0.783-1.933)  |
| <b>Total</b>               | 574(63.1) | 335(36.9) |                     |
| WHO Clinical AIDS staging  |           |           |                     |
| <b>Stage one</b>           | 174(75)   | 58(25)    | 1                   |
| <b>Stage two</b>           | 212(74.9) | 71(25.1)  | 1.005(0.673-1.5)    |
| <b>Stage three</b>         | 167(52.2) | 153(47.8) | 2.749(1.9-3.977)*   |
| <b>Stage four</b>          | 47(40.2)  | 70(59.8)  | 4.468(2.781-7.179)* |
| <b>Total</b>               | 600(63)   | 352(37)   |                     |
| CD4 cell count             |           |           |                     |
| <b>&lt;200</b>             | 277(54.7) | 229(45.3) | 2.323(1.750-3.083)* |
| <b>≥200</b>                | 295(73.8) | 105(26.3) | 1                   |
| <b>Total</b>               | 572(63.1) | 334(36.9) |                     |
| Functional status          |           |           |                     |

|                                      |           |           |                      |
|--------------------------------------|-----------|-----------|----------------------|
| <b>Ambulatory</b>                    | 68(38.9)  | 107(61.1) | 3.805(2.697-5.369)*  |
| <b>Bed ridden</b>                    | 9(30)     | 21(70)    | 5.643(2.542-12.525)* |
| <b>Working</b>                       | 503(70.7) | 208(29.3) | 1                    |
| <b>Total</b>                         | 580(63.3) | 336(36.7) |                      |
| Patient past opportunistic infection |           |           |                      |
| <b>Yes</b>                           | 508(63.1) | 297(36.9) | 1.033(0.730-1.462)   |
| <b>No</b>                            | 106(63.9) | 60(36.1)  | 1                    |
| <b>Total</b>                         | 614(63.2) | 357(36.8) |                      |
| HIV/AIDS disclosure status           |           |           |                      |
| <b>Yes</b>                           | 513(64.4) | 283(35.6) | 0.580(0.394-0.855)*  |
| <b>No</b>                            | 61(51.3)  | 58(48.7)  | 1                    |
| <b>Total</b>                         | 574(62.7) | 341(37.3) |                      |
| Access to spiritual care giver       |           |           |                      |
| <b>Yes</b>                           | 313(63.9) | 177(36.1) | 1.0(0.764-1.310)     |
| <b>No</b>                            | 276(63.9) | 156(36.1) | 1                    |
| <b>Total</b>                         | 589(63.9) | 333(36.1) |                      |
| Access to community support group    |           |           |                      |
| <b>Yes</b>                           | 174(63.3) | 101(36.7) | 0.995(0.743-1.333)   |
| <b>No</b>                            | 408(63.2) | 238(36.8) | 1                    |

|                                               |           |           |                     |
|-----------------------------------------------|-----------|-----------|---------------------|
| <b>Total</b>                                  | 582(63.2) | 339(36.8) |                     |
| Attended HIV related counseling session       |           |           |                     |
| <b>Yes</b>                                    | 244(62.7) | 145(37.3) | 1.032(0.787-1.354)  |
| <b>No</b>                                     | 337(63.5) | 194(36.5) | 1                   |
| <b>Total</b>                                  | 581(63.2) | 339(36.8) |                     |
| Attended HIV related health education session |           |           |                     |
| <b>Yes</b>                                    | 459(65.1) | 246(34.9) | 0.701(0.514-0.956)* |
| <b>No</b>                                     | 123(56.7) | 94(43.3)  | 1                   |
| <b>Total</b>                                  | 582(63.1) | 340(36.9) |                     |
| Diagnosed for active TB                       |           |           |                     |
| <b>Yes</b>                                    | 63(50.8)  | 61(49.2)  | 1.798(1.229-2.630)* |
| <b>No</b>                                     | 531(65)   | 286(35)   | 1                   |
| <b>Total</b>                                  | 594(63.1) | 347(36.9) |                     |

**Table 5:**

| Variables                    | Normal nutritional status<br>No (%) | Under nutrition<br>No (%) | AOR <sup>e</sup> for all variables (95%<br>CI <sup>d</sup> ) |
|------------------------------|-------------------------------------|---------------------------|--------------------------------------------------------------|
| Marital status               |                                     |                           |                                                              |
| <b>Married</b>               | 308(66.4)                           | 156(33.6)                 | 1                                                            |
| <b>Never married/ single</b> | 98(59.8)                            | 66(40.2)                  | 1.410(0.904-2.198)                                           |
| <b>Separated</b>             | 88(64.7)                            | 48(35.3)                  | 0.723(0.440-1.187)                                           |
| <b>Divorced</b>              | 52(63.4)                            | 30(36.6)                  | 1.506(0.835-2.716)                                           |
| <b>Widowed</b>               | 63(54.3)                            | 53(45.7)                  | 1.701(1.034-2.798)*                                          |
| <b>Total</b>                 | 609(63.3)                           | 353(36.7)                 |                                                              |
| WHO Clinical AIDS staging    |                                     |                           |                                                              |
| <b>Stage one</b>             | 174(75)                             | 58(25)                    | 1                                                            |
| <b>Stage two</b>             | 212(74.9)                           | 71(25.1)                  | 1.129(0.692-1.841)                                           |
| <b>Stage three</b>           | 167(52.2)                           | 153(47.8)                 | 2.267(1.392-3.693)*                                          |
| <b>Stage four</b>            | 47(40.2)                            | 70(59.8)                  | 3.147(1.667-5.943)*                                          |
| <b>Total</b>                 | 600(63)                             | 352(37)                   |                                                              |
| CD4 cell count               |                                     |                           |                                                              |
| <b>&lt;200</b>               | 277(54.7)                           | 229(45.3)                 | 2.037(1.463-2.837)*                                          |
| <b>≥200</b>                  | 295(73.8)                           | 105(26.3)                 | 1                                                            |
| <b>Total</b>                 | 572(63.1)                           | 334(36.9)                 |                                                              |
| Functional status            |                                     |                           |                                                              |



|                                               |           |           |                      |
|-----------------------------------------------|-----------|-----------|----------------------|
| <b>Ambulatory</b>                             | 68(38.9)  | 107(61.1) | 2.763(1.833-4.165)*  |
| <b>Bed ridden</b>                             | 9(30)     | 21(70)    | 4.677(1.761-12.419)* |
| <b>Working</b>                                | 503(70.7) | 208(29.3) | 1                    |
| <b>Total</b>                                  | 580(63.3) | 336(36.7) |                      |
| HIV/AIDS disclosure status                    |           |           |                      |
| <b>Yes</b>                                    | 513(64.4) | 283(35.6) | 0.847(0.505-1.421)   |
| <b>No</b>                                     | 61(51.3)  | 58(48.7)  | 1                    |
| <b>Total</b>                                  | 574(62.7) | 341(37.3) |                      |
| Attended HIV related Health Education session |           |           |                      |
| <b>Yes</b>                                    | 459(65.1) | 246(34.9) | 0.715(0.495-1.033)   |
| <b>No</b>                                     | 123(56.7) | 94(43.3)  | 1                    |
| <b>Total</b>                                  | 582(63.1) | 340(36.9) |                      |
| Diagnosed for active TB                       |           |           |                      |
| <b>Yes</b>                                    | 63(50.8)  | 61(49.2)  | 0.874(0.537-1.423)   |
| <b>No</b>                                     | 531(65)   | 286(35)   | 1                    |
| <b>Total</b>                                  | 594(63.1) | 347(36.9) |                      |
